# Supplementary material for: A regiospecific rhamnosyltransferase from Epimedium pseudowushanense catalyzes the 3-O-rhamnosylation of prenylflavonols
Source: Royal Society of Chemistry journal article supplement (doi:10.1039/c7ob02763j), 2017-12-12
Supplement: c7ob02763j1.pdf [file c7ob02763j1.pdf]

## Supporting Information for

### **A regiospecific rhamnosyltransferase from *Epimedium pseudowushanense* catalyzes the 3-O-rhamnosylation of prenylflavonols**

Keping Feng,<sup>a</sup> Ridao Chen,<sup>a</sup> Kebo Xie,<sup>a</sup> Dawei Chen,<sup>a</sup> Baolin Guo,<sup>b</sup> Xiao Liu,<sup>c</sup> Jimei Liu,<sup>a</sup> Min Zhang,<sup>a</sup> and Jungui Dai<sup>a</sup>

<sup>a</sup> State Key Laboratory of Bioactive Substance and Function of Natural Medicines, Institute of Materia Medica, Peking Union Medical College & Chinese Academy of Medical Sciences, 1 Xian Nong Tan Street, Beijing 100050, China.

E-mail: jgdai@imm.ac.cn

<sup>b</sup> Institute of Medicinal Plant Development, Peking Union Medical College & Chinese Academy of Medical Sciences, 151 Malianwa North Road, Beijing 100193, China.

<sup>c</sup> Modern Research Center for Traditional Chinese Medicine, Beijing University of Chinese Medicine, 11 North Third Ring Road, Beijing 100029, China.

## Table of Contents

**Scheme S1.** Proposed biosynthetic pathway of icariin in *Epimedium*.

**Table S1.** The HPLC method used in enzyme products analysis in this study.

**Table S2.** The HPLC method used in bioconversion analysis in this study.

**Table S3.** Details of the plasmids and strains used in this study.

**Table S4.** <sup>1</sup>H and <sup>13</sup>C NMR data of **1a** and **1**.

**Figure S1.** Multiple alignment of the amino acid sequences of EpRhS, RHM2 and OcRhS1.

**Figure S2.** Functional characterization of recombinant EpRhS combined with AtUGT78D1.

**Figure S3.** Multiple alignment of the amino acid sequences of EpPF3RT, AtUGT78D1 and AtUGT89C1.

**Figure S4.** The phylogenetic relationships between EpPF3RT and other plant GTs and microbial GTs.

**Figure S5.** HPLC-DAD/ESIMS analysis of EpPF3RT enzyme product using **2** as an aglycon acceptor.

**Figure S6.** HPLC-DAD/ESIMS analysis of EpPF3RT enzyme products using **3** as an aglycon acceptor.

**Figure S7.** HPLC-DAD/ESIMS analysis of EpPF3RT enzyme products using **4** as an aglycon acceptor.

**Figures S8, S9.** <sup>1</sup>H and <sup>13</sup>C NMR spectra of **1a**.

**Figures S10, S11.** <sup>1</sup>H and <sup>13</sup>C NMR spectra of **2a**.

**Figures S12, S13.** <sup>1</sup>H and <sup>13</sup>C NMR spectra of **3a**.

**Figures S14.** SDS-PAGE of recombinant His<sub>6</sub>-EpPF3RT and His<sub>6</sub>-EpRhS purified by affinity chromatography.

**Figure S15.** The linear regression models and the regression equations of the external standard methods established for the quantitative analysis of baohuoside II (A) and 8-prenylkaempferol (**1**) (B).

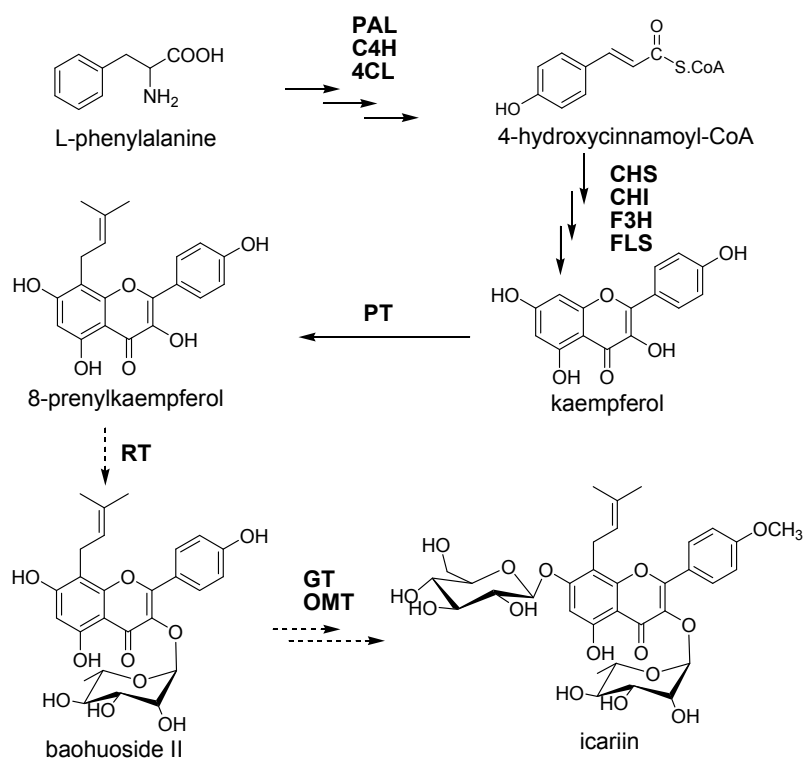

Scheme. S1 Proposed biosynthetic pathway of icariin in *Epimedium*. PAL, phenylalanine ammonia lyase; C4H, cinnamic acid 4-hydroxylase; 4CL, 4-coumaric acid ligase; CHS, chalcone synthase; CHI, chalcone isomerase; F3H, flavanone 3 $\beta$ -hydroxylase; FLS, flavonol synthase; PT, prenyltransferase; RT, rhamnosyltransferase; GT, glucosyltransferase; OMT, *O*-methyltransferase.

Table S1. The HPLC method used in analysis of enzymatic reactions *in vitro* in this study

| Time (min) | Solvent A (%)<br>0.1% formic acid | Solvent B (%)<br>CH <sub>3</sub> OH | flow rate<br>(mL min <sup>-1</sup> ) |
|------------|-----------------------------------|-------------------------------------|--------------------------------------|
| 0.00       | 90.0                              | 10.0                                | 1.0                                  |
| 10.00      | 50.0                              | 50.0                                | 1.0                                  |
| 30.00      | 0.0                               | 100.0                               | 1.0                                  |
| 45.00      | 0.0                               | 100.0                               | 1.0                                  |

Table S2. The HPLC method used in analysis of whole cell bioconversion in this study

| Time (min) | Solvent A(%)<br>0.1% formic acid | Solvent B(%)<br>CH <sub>3</sub> OH | flow rate<br>(mL min <sup>-1</sup> ) |
|------------|----------------------------------|------------------------------------|--------------------------------------|
| 0.00       | 50.0                             | 50.0                               | 1.0                                  |
| 20.00      | 0.0                              | 100.0                              | 1.0                                  |

Table S3. Details of the plasmids and strains used in this study

| plasmids or <i>E. coli</i> strain | relevant properties                               |
|-----------------------------------|---------------------------------------------------|
|                                   | <b>Plasmids</b>                                   |
| pET-28a                           | pBR322 ori, Kan <sup>r</sup>                      |
| pCDFDuet                          | CloDE13 ori, Str <sup>r</sup>                     |
| pE-PF3RT                          | pET-28a + <i>EpPF3RT</i>                          |
| pE-RhS                            | pET-28a + <i>EpRhS</i>                            |
| pC-PF3RT-RhS                      | pCDFDuet + <i>EpPF3RT</i> + <i>EpRhS</i>          |
|                                   | <b>Primers</b>                                    |
| pE-PF3RT forward                  | CAAATGGGTCGCGGATCCATGAGTTGTATTTTCAGTC             |
| pE- PF3RT reverse                 | GTGGTGGTGGTGCTCGAGTCAAACACCTTTAGCAAGTTT           |
| pC- PF3RT forward                 | GAATTCATGAGTTGTATTTTCAGTC                         |
| pC- PF3RT reverse                 | GTCGACTCAAACACCTTTAGCAAGTT                        |
| pE-RhS forward                    | CAAATGGGTCGCGGATCCATGGCAACTTATACGCCAAAAAACA<br>TC |
| pE- RhS reverse                   | GTGGTGGTGGTGCTCGAGTTAGATAGTTGTTTTCTTGTGGGTTTC     |
| pC- RhS forward                   | GAAGGAGATATACATATGGCAACTTATACGCCAAAAAAC           |
| pC- RhS reverse                   | TTCTTTACCAGACTCGAGTTAGATAGTTGTTTTCTTG             |
|                                   | <b>Strains</b>                                    |
| T-pE                              | Transetta (DE3) harboring empty pET-28a           |
| T-RT                              | Transetta (DE3) harboring pE- PF3RT               |
| T-RhS                             | Transetta (DE3) harboring pE-RhS                  |
| B-pC                              | BL21(DE3) harboring empty pCDFDuet                |
| B-PKR                             | BL21(DE3) harboring pC- PF3RT -RhS                |

Table S4. <sup>1</sup>H and <sup>13</sup>C NMR data of **1a** and **1**.

| H                   | $\delta_{\text{H}}$          |                            | C        | $\delta_{\text{C}}$ |          |
|---------------------|------------------------------|----------------------------|----------|---------------------|----------|
|                     | <b>1a</b>                    | <b>1</b>                   |          | <b>1a</b>           | <b>1</b> |
| H-6                 | 6.30 (1H, s)                 | 6.25 (1H, s)               | C-2      | 156.8               | 146.22   |
| H-3',5'             | 6.90 (2H, d, $J = 8.8$ Hz)   | 7.14 (2H, d, $J = 8.0$ Hz) | C-3      | 134.4               | 136.13   |
| H-2', 6'            | 7.74 (2H, d, $J = 8.8$ Hz)   | 8.16 (2H, d, $J = 8.0$ Hz) | C-4      | 177.9               | 176.46   |
| H-11                | 3.48 (2H, m)                 | 3.45 (2H, m)               | C-5      | 161.6               | 161.80   |
| H-12                | 5.14 (1H, t, $J = 7.2$ Hz)   | 5.20 (1H, t)               | C-6      | 98.3                | 99.31    |
| H-14                | 1.61 (3H, s)                 | 1.63 (3H, s)               | C-7      | 161.3               | 164.25   |
| H-15                | 1.67 (3H, s)                 | 1.73 (3H, s)               | C-8      | 105.9               | 108.93   |
| H-3',5'             | 6.90 (2H, d, $J = 8.8$ Hz)   | 7.14 (2H, d, $J = 8.0$ Hz) | C-9      | 153.8               | 157.72   |
| H-1''               | 5.26 (1H, d, $J = 1.6$ , Hz) |                            | C-10     | 104.2               | 105.11   |
| protons in rhamnose | 3.10–3.98                    |                            | C-1'     | 122.4               | 123.44   |
|                     |                              |                            | C-2', 6' | 130.4               | 128.91   |
|                     |                              |                            | C-3', 5' | 114.1               | 116.46   |
|                     |                              |                            | C-4'     | 158.8               | 160.58   |
|                     |                              |                            | C-11     | 21.2                | 21.71    |
|                     |                              |                            | C-12     | 122.3               | 121.57   |
|                     |                              |                            | C-13     | 131.0               | 131.95   |
|                     |                              |                            | C-14     | 25.4                | 25.49    |
|                     |                              |                            | C-15     | 17.8                | 19.18    |
|                     |                              | C-1''                      | 101.8    |                     |          |

|        |                                                                                                                   |      |      |
|--------|-------------------------------------------------------------------------------------------------------------------|------|------|
|        |                                                                                                                   | C-2" | 70.1 |
|        |                                                                                                                   | C-3" | 70.6 |
|        |                                                                                                                   | C-4" | 70.3 |
|        |                                                                                                                   | C-5" | 71.1 |
|        |                                                                                                                   | C-6" | 17.5 |
| RhM2   | MDDTTYKPKNLLITGAAGFIASHVANRIIRNYEYKIVVLDKLDYCSILKRNIPSPSSSENFKFFVRGDIASDLDVNLITLITSDITIMHFAAQTHTVDSFGNSFEETRNNI   |      | 110  |
| OcRhS1 | ..MASHYKPKNLLITGAAGFIASHVANRIIRNYEYKIVVLDKLDYCSILKRNIPSPSQISENFKFFVRGDIASDLDVNLITLITSDITIMHFAAQTHTVDSFGNSFEETRNNI |      | 108  |
| EpRhS  | ..MATYKPKNLLITGAAGFIASHVANRIIRNYEYKIVVLDKLDYCSILKRNIPSPRSSENFKFFVRGDIASDLDVNLITLITSDITIMHFAAQTHTVDSFGNSFEETRNNI   |      | 108  |
| RhM2   | YGTHVLLLEACKVTGCIIRFIHVSTDEVYGETDEDAVGNHEASQLLPINFYSATKAGAEMLVMAVGRSYGLFVITTRGNVYGPNQFPERIIPRFILLAMSGRFLPIHGD     |      | 220  |
| OcRhS1 | YGTHVLLLEACKVTGCIIRFIHVSTDEVYGETDEDAVGNHEASQLLPINFYSATKAGAEMLVMAVGRSYGLFVITTRGNVYGPNQFPERIIPRFILLAMSGRFLPIHGD     |      | 218  |
| EpRhS  | YGTHVLLLEACKVTGCVRFIHVSTDEVYGETDEDAVGNHEASQLLPINFYSATKAGAEMLVMAVGRSYGLFVITTRGNVYGPNQFPERIIPRFILLAMNGRFLPIHGD      |      | 218  |
| RhM2   | GSNVRSYLYCEDVAEAFVLLHKGEVGHVYNGTRERRVIDVADVCKLEGRTPSSICFVENRPFNDQRYFLDDQKRLILGWERTNWEGLRRTMDWYQNEBWWGD            |      | 330  |
| OcRhS1 | GSNVRSYLYCEDVAEAFVLLHKGEVGHVYNGTRERRVIDVADVCKLEGRTPSSICFVENRPFNDQRYFLDDQKRLILGWERTNWEGLRRTMDWYQNEBWWGD            |      | 328  |
| EpRhS  | GSNVRSYLYCEDVAEAFVLLHKGEVGHVYNGTRERRVIDVADVCKLEGRTPSSICFVENRPFNDQRYFLDDQKRLILGWERTNWEGLRRTMDWYQNEBWWGD            |      | 328  |
| RhM2   | VSGALLPFRMLMMEGG.RLSTGSSSEKKVDSNIVQTFVW....THANGD.SGIKASLRFLLYGRGTGWLGGLLGKICERKQGITVEYGRGLIETASVNDIRSIKPTH       |      | 433  |
| OcRhS1 | VSGALLPFRMLMMEGGIERQFDGADINGTISELMKKRFTQTEKEVEASRTANPCKRPMILRFLLYGRGTGWLGGLLGKICERKQGITVEYGRGLIETASVNDIRSIKPTH    |      | 438  |
| EpRhS  | VSGALLPFRMLMMEGGIERQFDGSDYVGTGTSSETRKANTIQSRMVVFTKSNP.STHKSSRFLLYGRGTGWLGGLLGKICERKQGITVEYGRGLIETASVNDIRSIKPTH    |      | 437  |
| RhM2   | VFNAAGVTGRPNVDWCESHKRETIRINNVGTLTLADVCREHGLLMNATGCIFFEYDAHPGEGSGVGFREEDFPNFGSFYSKTRAMVEELLREYDNVCLLRVMPISSD       |      | 543  |
| OcRhS1 | VFNAAGVTGRPNVDWCESHKRETIRINNVGTLTLADVCREHGLLMNATGCIFFEYDAHPGEGSGVGFREEDFPNFGSFYSKTRAMVEELLREYDNVCLLRVMPISSD       |      | 548  |
| EpRhS  | VFNAAGVTGRPNVDWCESHKRETIRINNVGTLTLADVCREHGLLMNATGCIFFEYDAHPGEGSGVGFREEDFPNFGSFYSKTRAMVEELLREYDNVCLLRVMPISSD       |      | 547  |
| RhM2   | INPRNFITKISRYNKVVIIPNSMTVLDLELPISEMAKRNLRGIWNETNPGVVSHEILEMYKVIIEFGFRWSNETVEQAKVIVAPRSNNEIDSKLSKEFPEMLLSIK        |      | 653  |
| OcRhS1 | INPRNFITKISRYNKVVIIPNSMTVLDLELPISEMAKRNLRGIWNETNPGVVSHEILEMYKVIIEFGFRWSNETVEQAKVIVAPRSNNEIDSKLSKEFPEMLLSIK        |      | 658  |
| EpRhS  | INPRNFITKISRYNKVVIIPNSMTVLDLELPISEMAKRNLRGIWNETNPGVVSHEILEMYKVIIEFGFRWSNETVEQAKVIVAPRSNNEIDSKLSKEFPEMLLSIK        |      | 657  |
| RhM2   | DSLIRKYVFEENRRTANKIDENTITIE                                                                                       |      | 679  |
| OcRhS1 | DSLIRKYVFEENRKYV.....                                                                                             |      | 672  |
| EpRhS  | DSLIRKYVFEENRRTII.....                                                                                            |      | 673  |

Fig. S1. Multiple alignment of the amino acid sequences of EpRhS, OcRhS (GenBank accession number ANK57460, from *Ornithogalum longebracteatum*) and RHM2 (GenBank accession number NM\_104228, from *Arabidopsis. thaliana*).

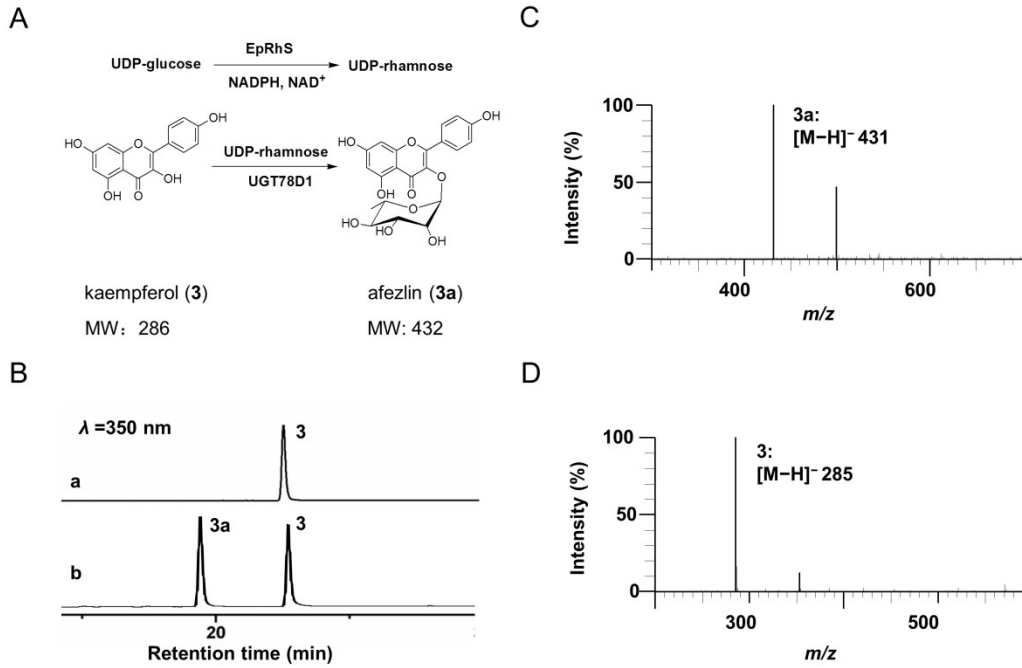

Fig. S2. Functional characterization of recombinant EpRhS combined with AtUGT78D1. A) Enzymatic reaction catalysed by EpRhS and AtUGT78D1; B) HPLC/ESI-MS analysis of the enzymatic reaction of AtUGT78D1 combined with kaempferol (**3**). a) Standard of **3**; b) Recombinant AtUGT78D1 with EpRhS reaction mixture; C), D) MS spectrum of **3** and **3a** at negative mode.

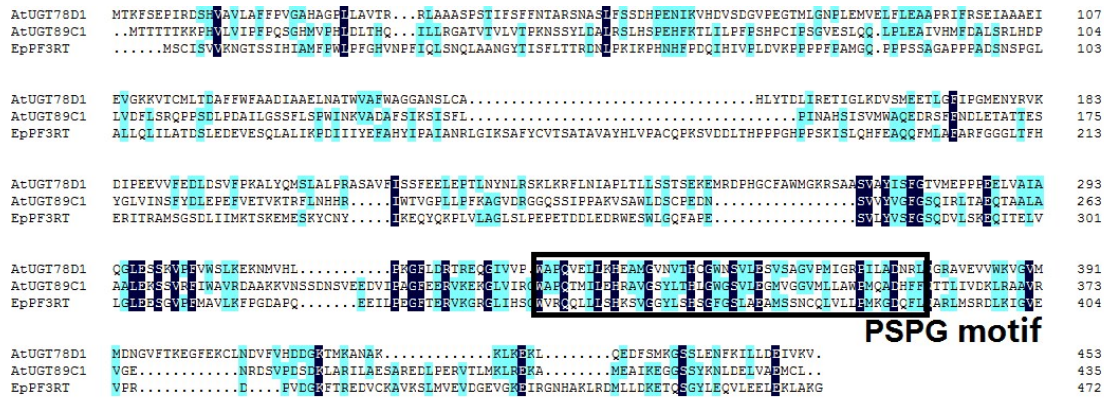

Fig. S3 Multiple alignment of the amino acid sequences of EpPF3RT, AtUGT78D1 (GenBank accession number NM\_102790, from *Arabidopsis thaliana*) and AtUGT89C1 (GenBank accession number XP\_002892315, from *A. thaliana*). The black box indicates the conserved region of plant secondary product glycosyltransferases (PSPG motif)

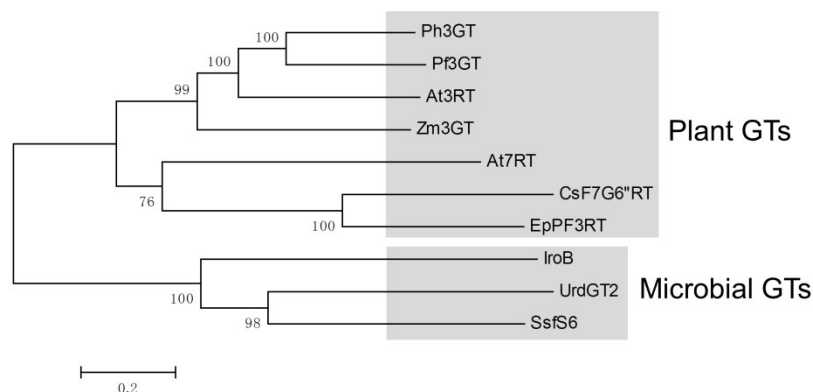

Fig. S4. The phylogenetic relationships between EpPF3RT and other plant GTs and microbial GTs. The results were calculated using the MEGA version 5 software. Method: Neighbor-joining, Bootstrap: 1000. The branch lengths represent relative genetic distances. The protein sequences and corresponding accession numbers that were used for this comparison are as follows: Ph3GT (GenBank accession number AB027454, from *Petunia x hybrida*); Pf3GT (GenBank accession number AB002818, from *Perilla frutescens*); At3RT (GenBank accession number NM\_102790, from *Arabidopsis thaliana*); Zm3GT (GenBank accession number X13501, from *Zea mays*); CsF7G6"Rt (GenBank accession number NP\_001275829, from *Citrus sinensis*); At7RT (GenBank accession number XP\_002892315, from *A. thaliana*); UrdGT2 (GenBank accession number AAF00209, from *Streptomyces fradiae*); IroB (GenBank accession number CAE55724, from *Escherichia coli*); SsfS6 (GenBank accession number ADE34512, from *Streptomyces sp*);

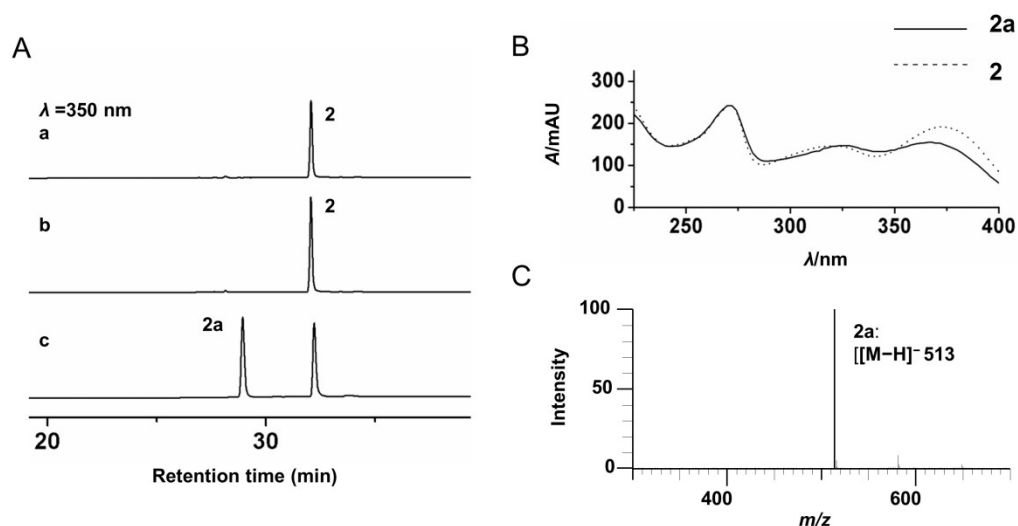

Fig. S5. HPLC-DAD/ESIMS analysis of EpPF3RT enzyme products using **2** as an aglycon acceptor. A) HPLC/ESI-MS analysis of the enzymatic reaction with anhydroicaritin (**2**). a) Standard of **2**; b) Control group; c) Recombinant EpPF3RT; B) UV spectra of **2** and **2a**. C) MS spectrum of **2a** at negative mode.



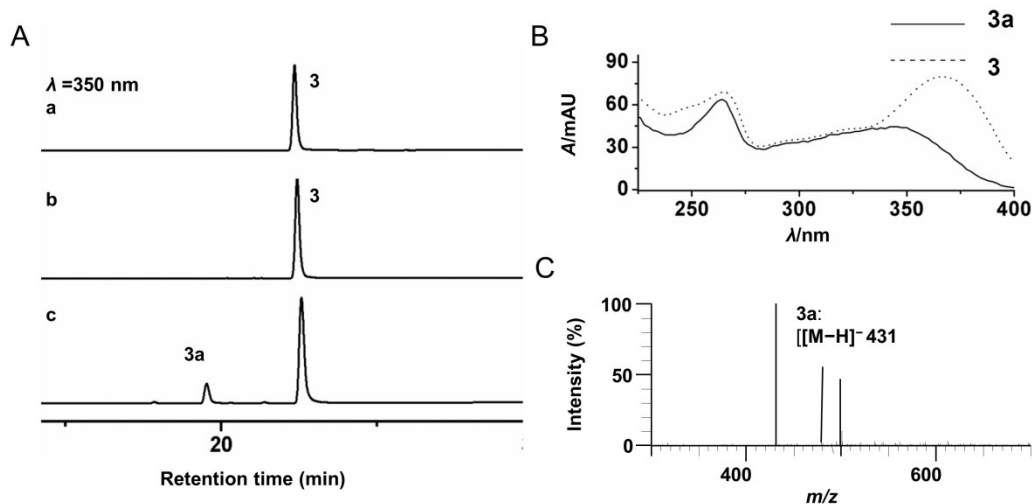

Fig. S6. HPLC-DAD/ESIMS analysis of EpPF3RT enzyme products using **3** as an aglycon acceptor. A) HPLC/ESI-MS analysis of the enzymatic reaction with kaempferol (**3**). a) Standard of **3**; b) Control group; c) Recombinant EpPF3RT; B) UV spectra of **3** and **3a**. C) MS spectrum of **3a** at negative mode.

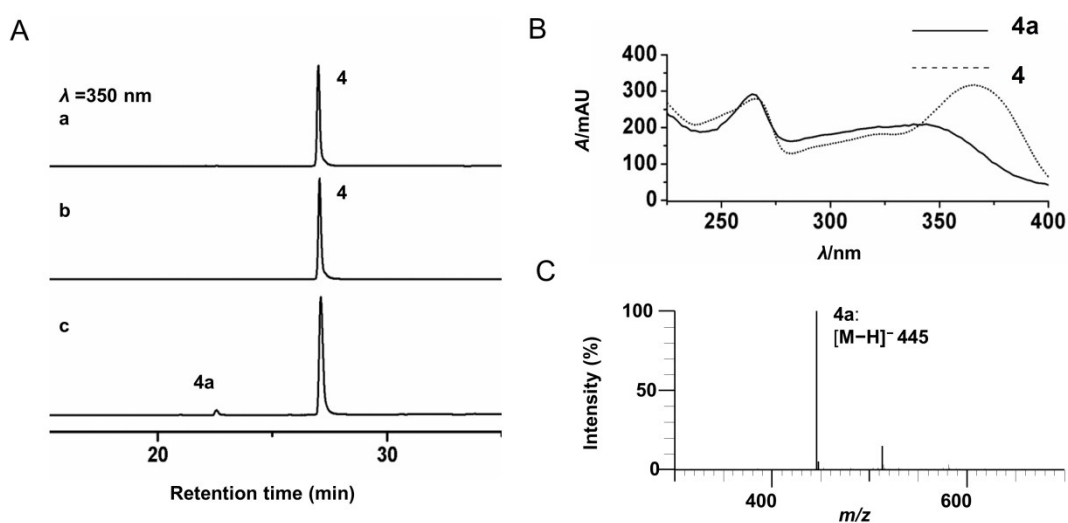

Fig. S7. HPLC-DAD/ESIMS analysis of EpPF3RT enzyme products using **4** as an aglycon acceptor. A) HPLC/ESI-MS analysis of the enzymatic reaction with kaempferide (**4**). a) Standard of **4**; b) Control group; c) Recombinant EpPF3RT; B) UV spectra of **4** and **4a**. C) MS spectrum of **4a** at negative mode.

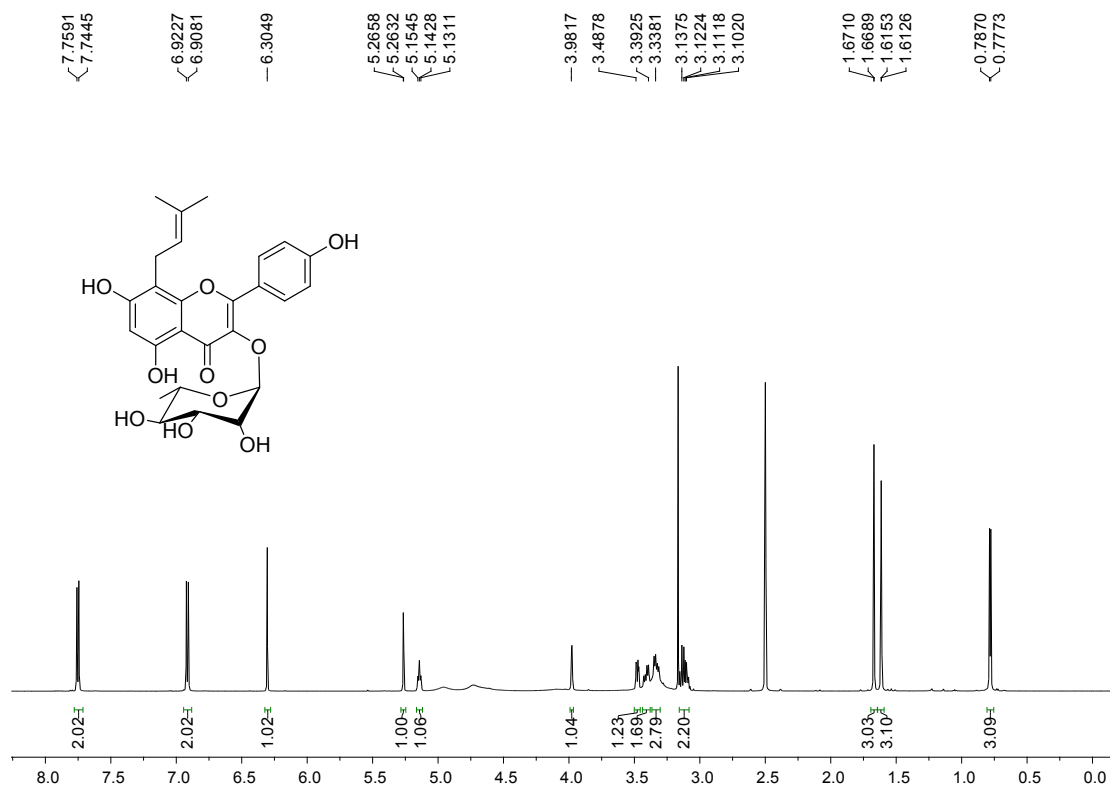

Fig. S8. <sup>1</sup>H NMR spectrum of **1a** (DMSO-*d*<sub>6</sub>, 600 MHz).

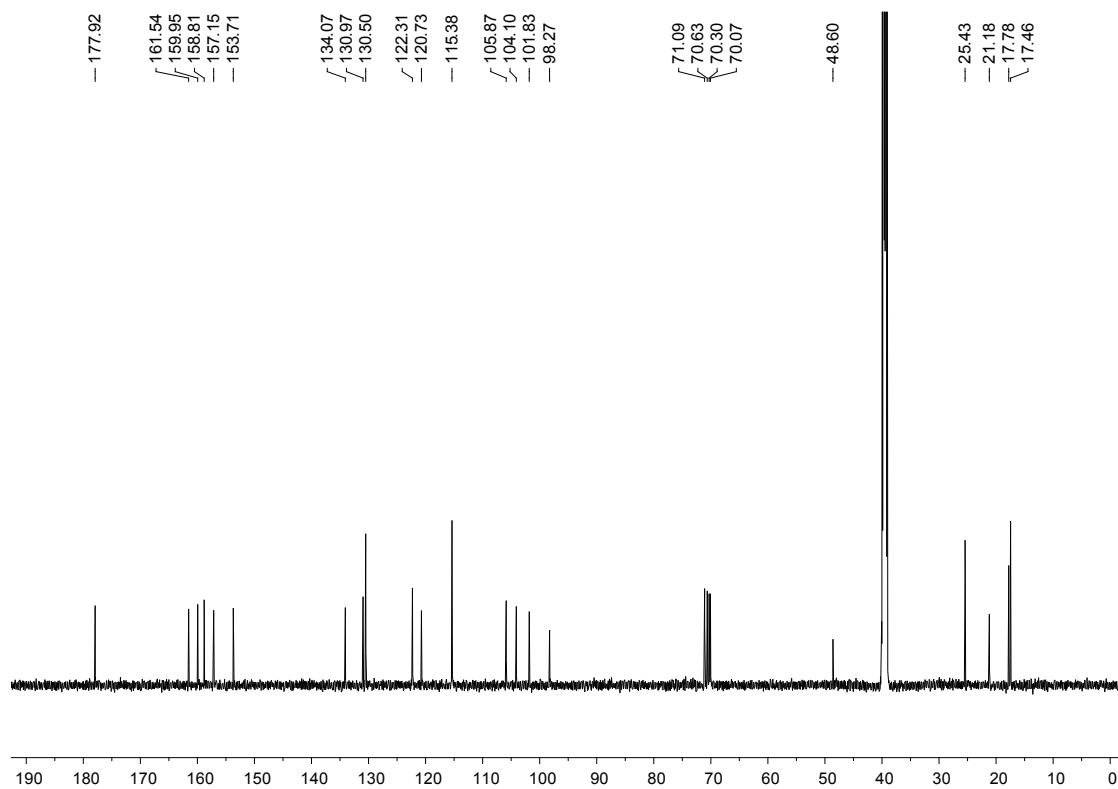

Fig. S9.  $^{13}\text{C}$  NMR spectrum of **1a** (DMSO- $d_6$ , 125 MHz).

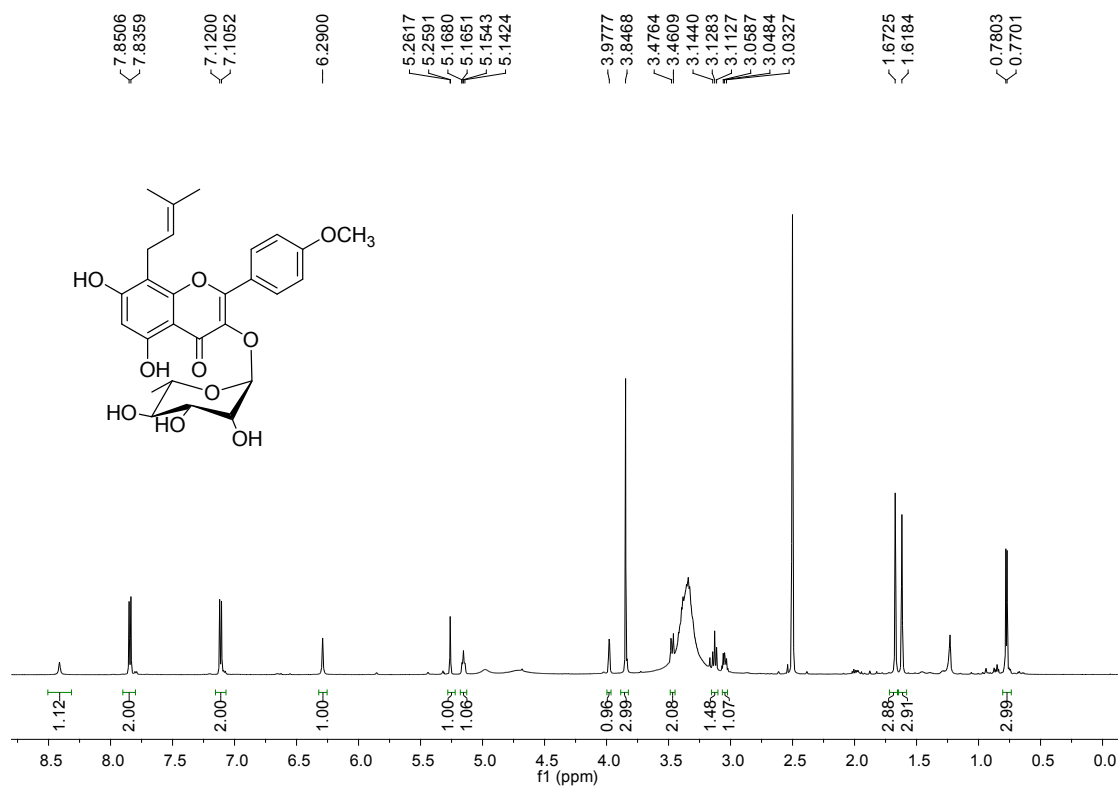

Fig. S10.  $^1\text{H}$  NMR spectrum of **2a** (DMSO- $d_6$ , 600 MHz).

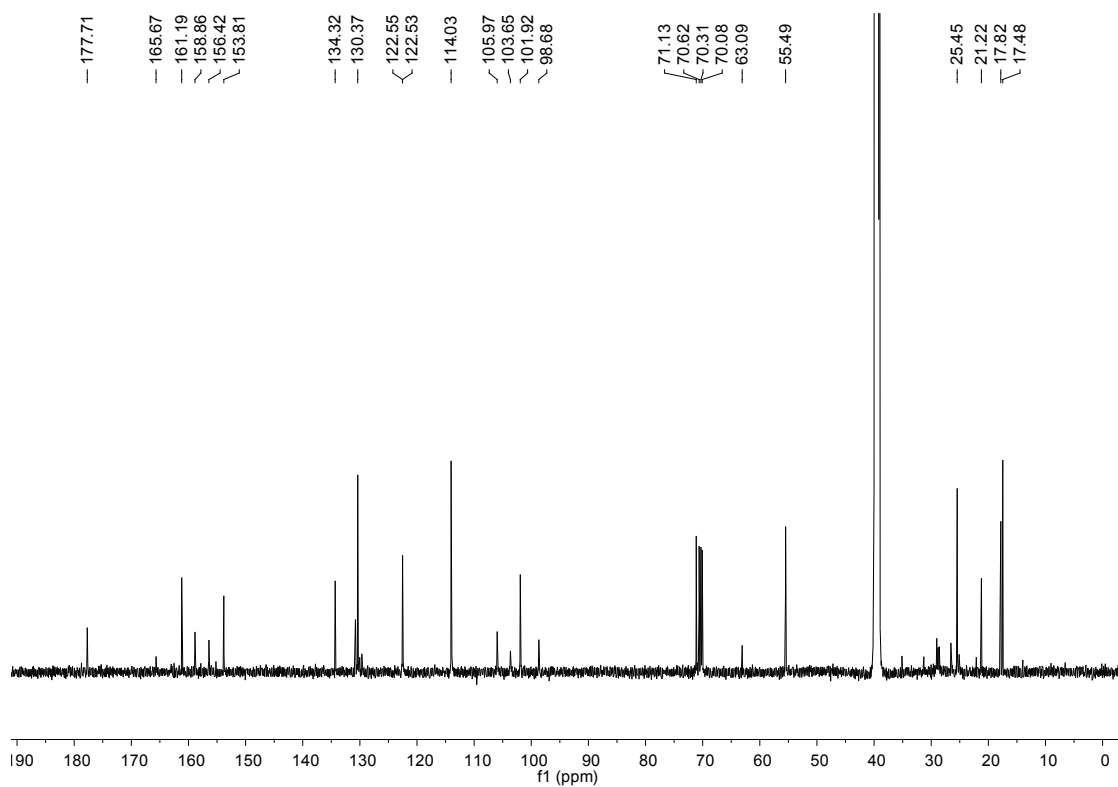

Fig. S11.  $^{13}\text{C}$  NMR spectrum of **2a** (DMSO- $d_6$ , 125 MHz).

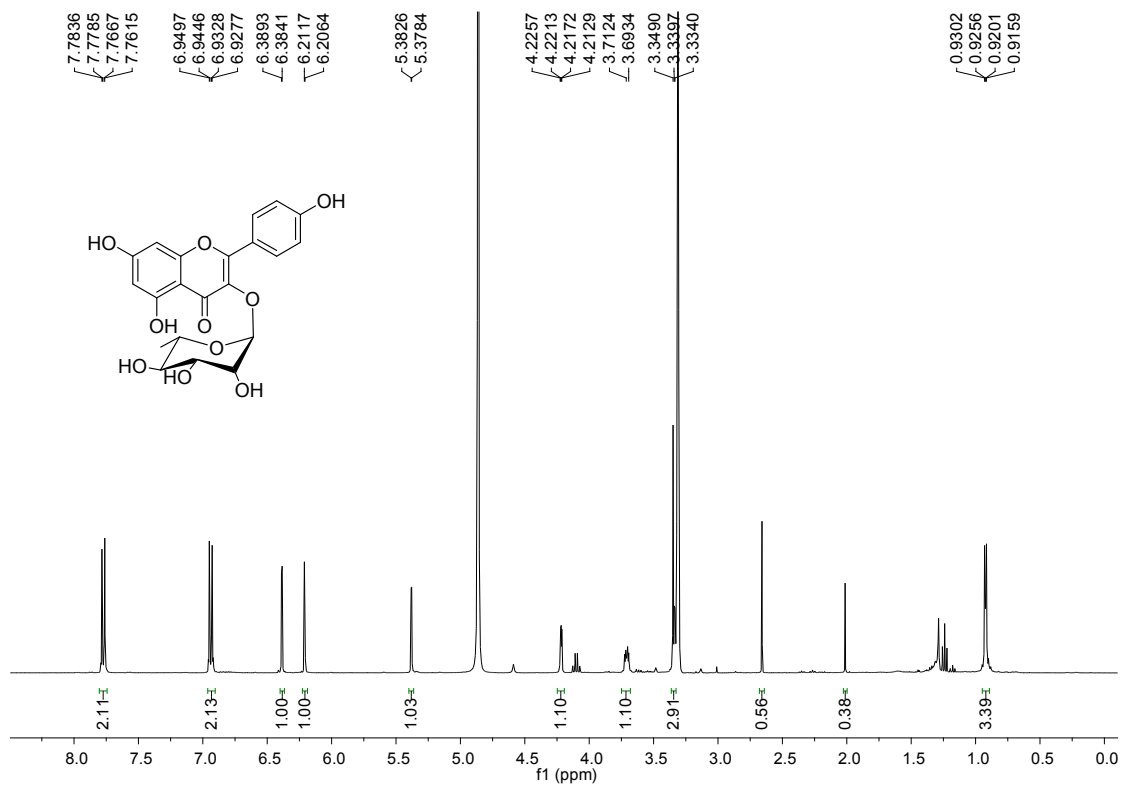

Fig. S12. <sup>1</sup>H NMR spectrum of **3a** (Methanol-*d*<sub>4</sub>, 400 MHz).

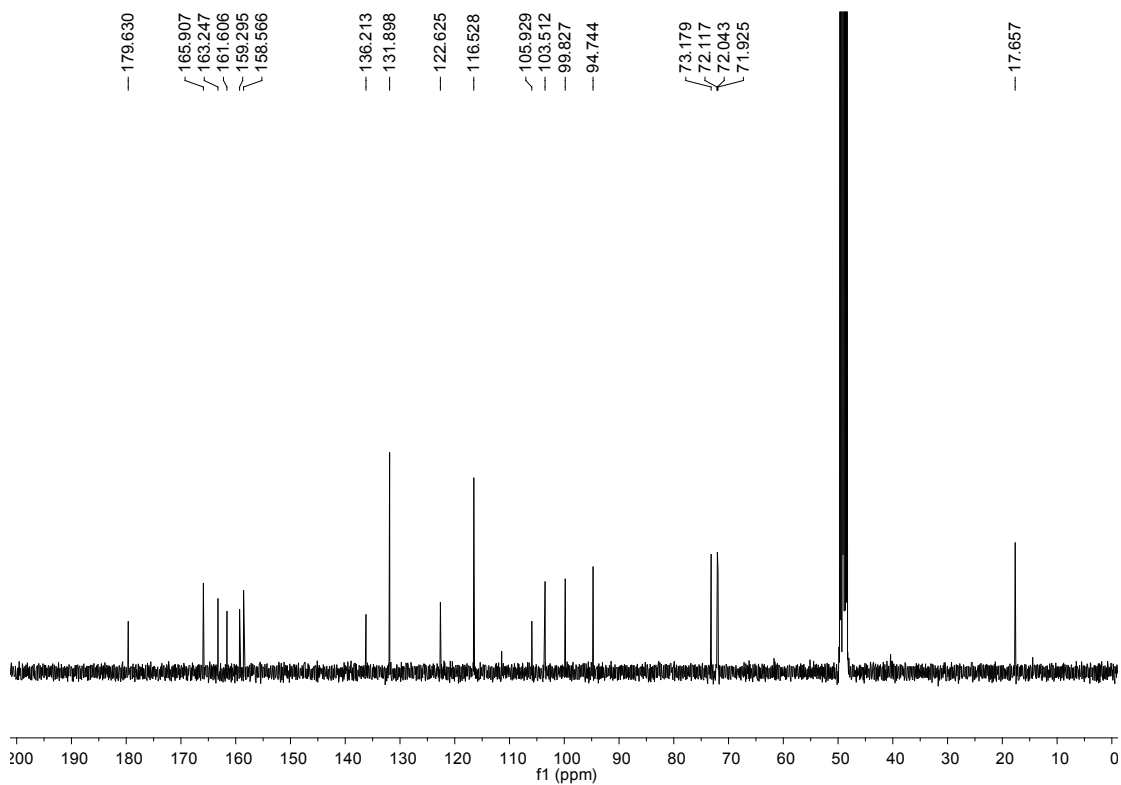

Fig. S13. <sup>13</sup>C NMR spectrum of **3a** (Methanol-*d*<sub>4</sub>, 100 MHz).

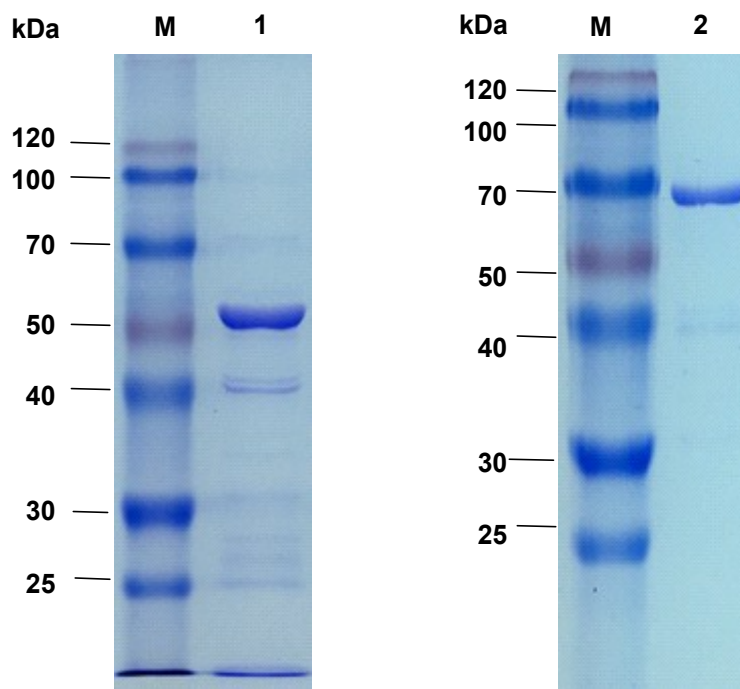

Fig. S14. SDS-PAGE of recombinant His<sub>6</sub>-EpPF3RT and His<sub>6</sub>-EpRhS purified by affinity chromatography. Lane M: Protein Marker; Lane 1: His-tagged EpPF3RT (predicted M.W., 52.1 kDa) purified on Ni Sepharose. Lane 2: His-tagged EpRhS (predicted M.W., 75.6 kDa) purified on Ni Sepharose.

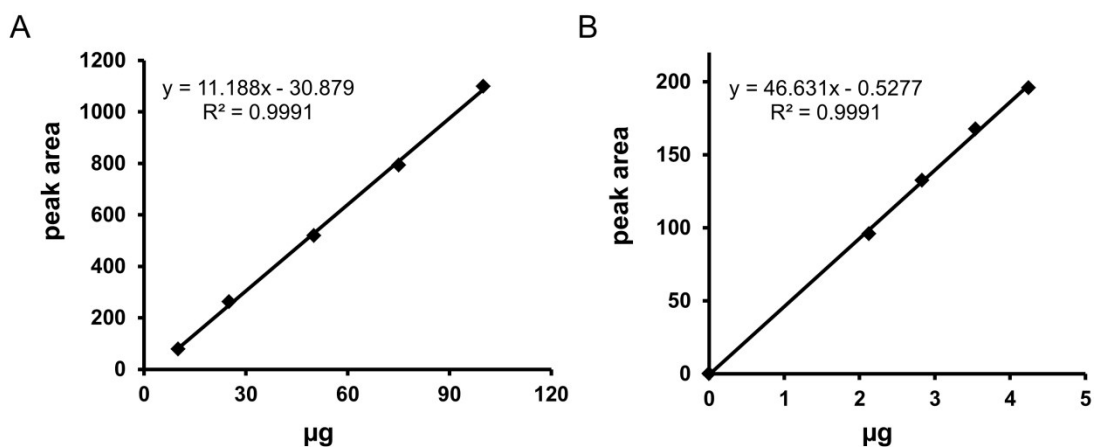

Fig. S15. The linear regression models and the regression equations of the external standard methods established for the quantitative analysis of baohuoside II (A) and 8-prenylkaempferol (**1**) (B).
